# Supplementary material
Source: publisher site journal article supplement (https://www.spandidos-publications.com/436/downloadSupplementary)

Figure S1. Overexpression of TWIST1 or COL11A1 promotes the growth of colon cancer cells by targeting different genes. (A) TWIST1 reduced the expression of E-cadherin and enhanced the expression N-cadherin in HCT116 cells. The Flag-TWIST1 plasmids were transfected into the colon cancer HCT116 cells; after 36 h, cells were collected. TWIST1 expression was analyzed using a corresponding Flag-antibody. E-cadherin and N-cadherin expression was determined using RT-qPCR, and the expression levels were normalized to those of GAPDH mRNA. The results are shown as the means  $\pm$  standard deviations of three independent experiments. \*\* $P < 0.01$ , vs. control. (B) COL11A1 enhanced the expression of IKK $\beta$  in HCT116 cells. The Flag-COL11A1 plasmids were transfected into the colon cancer HCT116 cells; after 36 h, cells were collected for western blotting and for RT-qPCR analysis. COL11A1 expression was investigated using a corresponding Flag-antibody. The expression of IKK $\beta$  was analyzed by RT-qPCR, and was normalized to the expression of GAPDH mRNA. Results are representative of three independent experiments. the error bars represent the SD. \*\* $P < 0.01$ , \*\*\* $P < 0.001$  vs. control. COL11A1, collagen type XI  $\alpha$ 1 chain; RT-qPCR, reverse transcription-quantitative polymerase chain reaction; TWIST1, Twist family bHLH transcription factor 1.

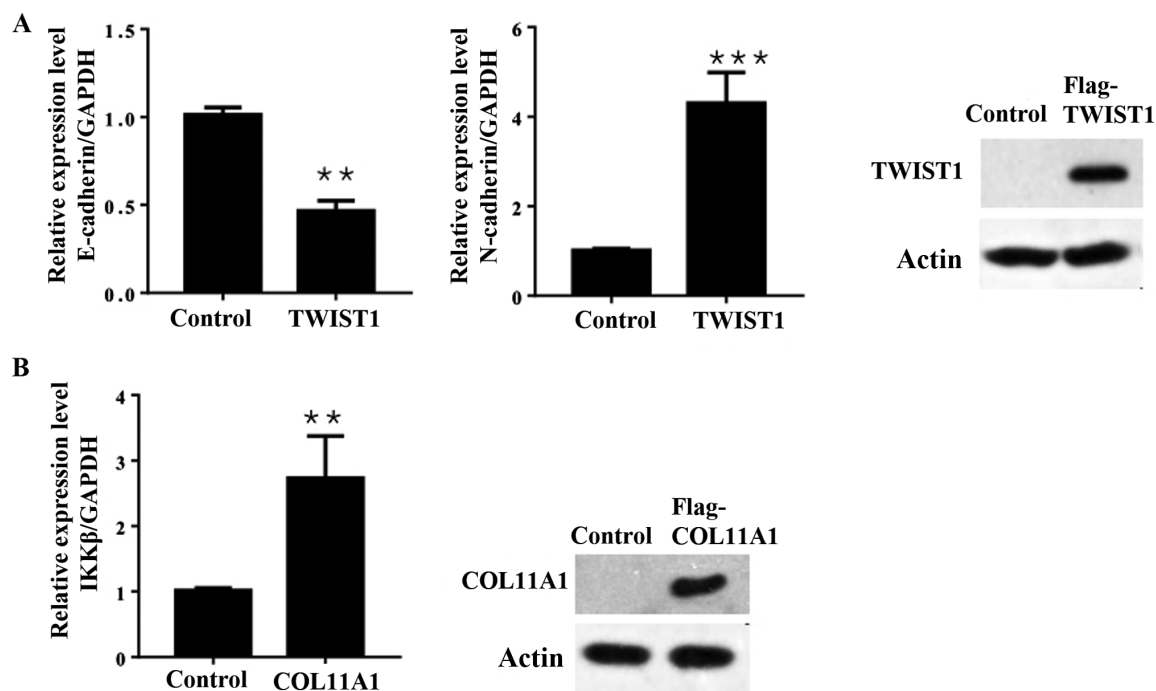

Supplement: Supplementary file 1 [file downloadSupplementary]
